# Supplementary material
Source: HighWire-hosted journal article supplement (https://jnm.snmjournals.org/highwire/filestream/94539/field_highwire_adjunct_files/0/131565_Supplemental_Data.pdf)
Supplement: 131565_Supplemental_Data.pdf [file 131565_Supplemental_Data.pdf]

**SUPPLEMENTAL DATA**

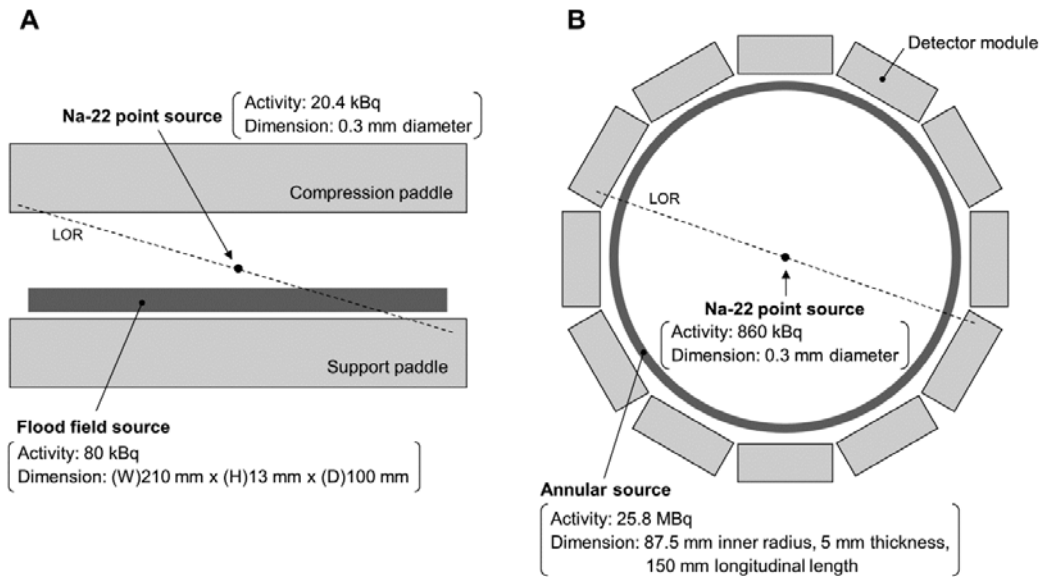

**SUPPLEMENTAL FIGURE 1.** Schematic of spatial resolution evaluations with a background activity in a commercially available positron emission mammography system (A) and the dedicated breast PET scanner (B). In a previous study (3), spatial resolutions with a background activity for the positron emission mammography system were evaluated with a flood field source (A). To obtain spatial resolutions with a background activity for the dedicated breast PET system, an annular phantom filled with an  $^{18}\text{F}$  solution with an activity 30 times higher than that of the  $^{22}\text{Na}$  point source was placed inside the scanner (B) for reproducing the same background level per line of response as in A. These annular phantom data were merged with point-source data for each position to produce fused list-mode data files. The list-mode DRAMA reconstructions were then performed with the same parameters (128 subsets, 1 iteration) as used in Fig. 2B.

**SUPPLEMENTAL TABLE 1.** Comparison of Spatial Resolutions (FWHM) With and Without

Background Activity at the Axial Center and the 1/4 Axial FOV

| Plane position   | Transverse<br>offset<br>(mm) | Direction  | FWHM (mm)                      |                          |
|------------------|------------------------------|------------|--------------------------------|--------------------------|
|                  |                              |            | Without background<br>activity | With background activity |
| At axial center  | 5                            | Radial     | 0.80                           | 0.81                     |
|                  |                              | Tangential | 0.85                           | 0.86                     |
|                  |                              | Axial      | 0.98                           | 0.98                     |
|                  | 75                           | Radial     | 1.31                           | 1.32                     |
|                  |                              | Tangential | 0.94                           | 0.95                     |
|                  |                              | Axial      | 0.82                           | 0.83                     |
| At 1/4 axial FOV | 5                            | Radial     | 0.78                           | 0.79                     |
|                  |                              | Tangential | 0.85                           | 0.86                     |
|                  |                              | Axial      | 0.88                           | 0.88                     |
|                  | 75                           | Radial     | 1.34                           | 1.35                     |
|                  |                              | Tangential | 0.90                           | 0.91                     |
|                  |                              | Axial      | 0.87                           | 0.87                     |
